# Supplementary material
Source: PubMed Central journal article supplement (PMC6278967)
Supplement: 2018_193151-Disclosures_and_Contributions.pdf [file 2018_193151-Disclosures_and_Contributions.pdf]

Haematologica  
HAEMATOL/2018/193151  
Version 3

Reducing mortality in newly diagnosed standard-risk acute promyelocytic leukemia in elderly treated with arsenic trioxide requires major reduction of chemotherapy: a report by the French Belgian Swiss APL group

Ramy Rahmé, Lionel Ades, Xavier Thomas, Agnès Guerci-Bresler, Arnaud Pigneux, Norbert Vey, Emmanuel Raffoux, Sylvie Castaigne, Olivier Spertini, Sebastian Wittnebel, Jean Pierre Marolleau, Gandhi Damaj, Dominique Bordessoule, Julie Lejeune, Sylvie Chevret, and Pierre Fenaux

Disclosures: No disclosures for all the authors.

Contributions: RR, LA and PF wrote the manuscript. LA, JL and SC performed data analysis. LA and PF supervised the study. All the authors contributed to data collection.
